# Supplementary material for: Gastrointestinal predictors of severe COVID-19: systematic review and meta-analysis
Source: PubMed Central journal article supplement — Ann Gastroenterol. 2020 Jul 30;33(6):615–30. doi: 10.20524/aog.2020.0527 (PMC7599357; doi:10.20524/aog.2020.0527), 2020-07-30
Supplement: AnnGastroenterol-33-615_Suppl1.pdf [file AnnGastroenterol-33-615_Suppl1.pdf]

## Supplementary material

**Supplementary Table 1** EMBASE search strategy

| No. | Query                                                                                                                                                                                                                                                                                                                                                                                                                                                                                                                                                                                                                                                                                   | Results |
|-----|-----------------------------------------------------------------------------------------------------------------------------------------------------------------------------------------------------------------------------------------------------------------------------------------------------------------------------------------------------------------------------------------------------------------------------------------------------------------------------------------------------------------------------------------------------------------------------------------------------------------------------------------------------------------------------------------|---------|
| 1.  | gi OR 'gastro intestin*' OR gastrointestinal* OR diarrhea* OR constipate* OR dyspep* OR dyschezia* OR obstipat* OR dysbiosis* OR indigestion* OR dysmotilit* OR nausea* OR vomit* OR emesis* OR hematemesi* OR 'abdominal pain*' OR amylase OR lipase OR alt OR 'alanine aminotransferase*' OR ast OR 'aspartate aminotransferase*' OR bilirubin OR 'alk phos' OR 'alkaline phosphatase*' OR cea OR 'carcinoembryonic antigen*' OR 'ca19 9' OR 'carbohydrate antigen 19 9' OR ggt OR 'γ glutamyltransferase*' OR 'gamma glutamyltransferas3*' OR 'γ glutamyltransferase*' OR 'fecal calprotectin*' OR 'fecal leukocyte'                                                                 | 1858951 |
| 2.  | ((('coronavirinae'/exp OR 'coronavirus infection'/de OR coronavirus*:ti,ab,kw OR 'corona virus*':ti,ab,kw OR 'pneumonia virus*':ti,ab,kw OR cov:ti,ab,kw OR ncov:ti,ab,kw) AND (outbreak:ti,ab,kw OR wuhan:ti,ab,kw) OR covid19:ti,ab,kw OR 'covid 19':ti,ab,kw OR ((coronavirus*:ti,ab,kw OR 'corona virus*':ti,ab,kw) AND 2019:ti,ab,kw) OR 'sars cov 2':ti,ab,kw OR sars2:ti,ab,kw OR 'coronavirus*':ti,ab,kw OR 'corona virus*':ti,ab,kw OR 'ncov 2019':ti,ab,kw OR ncov:ti,ab,kw OR 'sars coronavirus 2':ti,ab,kw OR 'sars corona virus 2':ti,ab,kw OR 'severe acute respiratory syndrome cov 2':ti,ab,kw OR 'severe acute respiratory syndrome cov2':ti,ab,kw) AND [2019-2020]/py | 20818   |
| 3.  | #1 AND #2                                                                                                                                                                                                                                                                                                                                                                                                                                                                                                                                                                                                                                                                               | 1170    |
| 4.  | #3 NOT ('conference abstract'/it OR 'editorial'/it OR 'review'/it OR 'short survey'/it)                                                                                                                                                                                                                                                                                                                                                                                                                                                                                                                                                                                                 | 1021    |
| 5.  | #4 NOT ('animal cell'/de OR 'animal experiment'/de OR 'animal model'/de OR 'animal tissue'/de OR 'meta analysis'/de OR 'practice guideline'/de OR 'systematic review'/de)                                                                                                                                                                                                                                                                                                                                                                                                                                                                                                               | 825     |
| 6.  | #4 NOT ('animal cell'/de OR 'animal experiment'/de OR 'animal model'/de OR 'animal tissue'/de OR 'meta analysis'/de OR 'practice guideline'/de OR 'systematic review'/de) AND [1-4-2020]/sd NOT [1-8-2020]/sd                                                                                                                                                                                                                                                                                                                                                                                                                                                                           | 749     |

\*Searches for human or excluding nonhuman or animal studies were inconsistently indexed, so were abandoned as a strategy

**Supplementary Table 2** QUIPS table for risk of bias

| Study, year          | Participation<br>(The study sample represents population of interest on key characteristics?) | Attrition<br>(The proportion of study sample providing outcome data is adequate?) | Prognostic factor measurement<br>(Prognostic factor is adequately measured in study subjects?) | Outcome measurement (The outcome of interest is adequately measured in study subjects?) | Study confounders<br>(Potential confounders are accounted for?) | Statistical analysis?<br>(Statistical analysis appropriately designed for the study?) |
|----------------------|-----------------------------------------------------------------------------------------------|-----------------------------------------------------------------------------------|------------------------------------------------------------------------------------------------|-----------------------------------------------------------------------------------------|-----------------------------------------------------------------|---------------------------------------------------------------------------------------|
| Guan, 2020 [1]       | Yes                                                                                           | Yes                                                                               | Yes                                                                                            | Yes                                                                                     | Partly                                                          | Yes                                                                                   |
| Wang, 2020 [9]       | Yes                                                                                           | Yes                                                                               | Yes                                                                                            | Yes                                                                                     | No                                                              | Yes                                                                                   |
| Huang, 2020 [10]     | Yes                                                                                           | Partly                                                                            | Yes                                                                                            | Yes                                                                                     | Partly                                                          | Yes                                                                                   |
| Chen, 2020 [11]      | Yes                                                                                           | Yes                                                                               | No                                                                                             | Yes                                                                                     | No                                                              | Yes                                                                                   |
| Chen, 2020 [3]       | Yes                                                                                           | Yes                                                                               | Yes                                                                                            | Yes                                                                                     | Partly                                                          | Yes                                                                                   |
| Liu, 2020 [12]       | Yes                                                                                           | Yes                                                                               | Yes                                                                                            | Yes                                                                                     | No                                                              | Yes                                                                                   |
| Liu, 2020 [13]       | Yes                                                                                           | Yes                                                                               | No                                                                                             | Yes                                                                                     | No                                                              | Yes                                                                                   |
| Wu, 2020 [14]        | Yes                                                                                           | Yes                                                                               | No                                                                                             | Yes                                                                                     | Partly                                                          | Yes                                                                                   |
| Wu, 2020 [15]        | Yes                                                                                           | Partly                                                                            | No                                                                                             | Yes                                                                                     | Partly                                                          | Yes                                                                                   |
| Xu, 2020 [16]        | Yes                                                                                           | Yes                                                                               | No                                                                                             | Yes                                                                                     | Partly                                                          | Yes                                                                                   |
| Luo, 2020 [17]       | Yes                                                                                           | Yes                                                                               | No                                                                                             | Yes                                                                                     | No                                                              | Partly                                                                                |
| Chen, 2020 [18]      | Yes                                                                                           | Yes                                                                               | Yes                                                                                            | Yes                                                                                     | No                                                              | Yes                                                                                   |
| Lei, 2020 [19]       | Yes                                                                                           | Partly                                                                            | No                                                                                             | Yes                                                                                     | No                                                              | Partly                                                                                |
| Jin, 2020 [20]       | Yes                                                                                           | Yes                                                                               | No                                                                                             | Yes                                                                                     | Partly                                                          | Yes                                                                                   |
| Mo, 2020 [21]        | Yes                                                                                           | Yes                                                                               | Yes                                                                                            | Yes                                                                                     | No                                                              | Yes                                                                                   |
| Wan, 2020 [22]       | Yes                                                                                           | Yes                                                                               | Yes                                                                                            | Yes                                                                                     | No                                                              | Yes                                                                                   |
| Xiao, 2020 [23]      | Yes                                                                                           | Yes                                                                               | No                                                                                             | Yes                                                                                     | No                                                              | Partly                                                                                |
| Yao, 2020 [24]       | Yes                                                                                           | Yes                                                                               | No                                                                                             | Yes                                                                                     | No                                                              | Yes                                                                                   |
| Young, 2020 [25]     | Yes                                                                                           | Yes                                                                               | No                                                                                             | Yes                                                                                     | No                                                              | Partly                                                                                |
| Zhang, 2020 [26]     | Yes                                                                                           | Yes                                                                               | Yes                                                                                            | Yes                                                                                     | No                                                              | Yes                                                                                   |
| Zhang, 2020 [27]     | Yes                                                                                           | Yes                                                                               | Yes                                                                                            | Yes                                                                                     | No                                                              | Yes                                                                                   |
| Zhang, 2020 [28]     | Yes                                                                                           | Yes                                                                               | No                                                                                             | Yes                                                                                     | No                                                              | Yes                                                                                   |
| Zhou, 2020 [29]      | Yes                                                                                           | Yes                                                                               | No                                                                                             | Yes                                                                                     | No                                                              | Yes                                                                                   |
| Zhao, 2020 [30]      | Yes                                                                                           | Partly                                                                            | No                                                                                             | Yes                                                                                     | No                                                              | Partly                                                                                |
| Shi, 2020 [31]       | Yes                                                                                           | Yes                                                                               | No                                                                                             | Yes                                                                                     | No                                                              | Yes                                                                                   |
| Liu, 2020 [32]       | Yes                                                                                           | Yes                                                                               | Yes                                                                                            | Yes                                                                                     | Partly                                                          | Yes                                                                                   |
| Liu, 2020 [33]       | Yes                                                                                           | Yes                                                                               | Yes                                                                                            | Yes                                                                                     | No                                                              | Partly                                                                                |
| Liu, 2020 [34]       | Yes                                                                                           | Yes                                                                               | Yes                                                                                            | Yes                                                                                     | No                                                              | Yes                                                                                   |
| Zhang, 2020 [35]     | Yes                                                                                           | Yes                                                                               | Yes                                                                                            | Yes                                                                                     | Partly                                                          | Yes                                                                                   |
| Zhou, 2020 [36]      | Yes                                                                                           | Partly                                                                            | No                                                                                             | Yes                                                                                     | No                                                              | Yes                                                                                   |
| Han, 2020 [37]       | Yes                                                                                           | Yes                                                                               | No                                                                                             | Yes                                                                                     | No                                                              | Partly                                                                                |
| Peng, 2020 [38]      | Yes                                                                                           | Yes                                                                               | Yes                                                                                            | Yes                                                                                     | No                                                              | Partly                                                                                |
| Shi, 2020 [39]       | Yes                                                                                           | Partly                                                                            | No                                                                                             | Yes                                                                                     | Partly                                                          | Yes                                                                                   |
| Wang, 2020 [40]      | Yes                                                                                           | Yes                                                                               | Yes                                                                                            | Yes                                                                                     | No                                                              | Yes                                                                                   |
| Xie, 2020 [41]       | Yes                                                                                           | Yes                                                                               | Yes                                                                                            | Yes                                                                                     | Partly                                                          | Yes                                                                                   |
| Cai, 2020 [42]       | Yes                                                                                           | Yes                                                                               | Yes                                                                                            | Yes                                                                                     | No                                                              | Yes                                                                                   |
| Gao, 2020 [43]       | Yes                                                                                           | Yes                                                                               | Yes                                                                                            | Yes                                                                                     | No                                                              | Yes                                                                                   |
| Zhou, 2020 [44]      | Yes                                                                                           | Yes                                                                               | Yes                                                                                            | Yes                                                                                     | Partly                                                          | Yes                                                                                   |
| Bonetti, 2020 [45]   | Yes                                                                                           | Partly                                                                            | Yes                                                                                            | Yes                                                                                     | Partly                                                          | Yes                                                                                   |
| Buscarini, 2020 [46] | Yes                                                                                           | Yes                                                                               | No                                                                                             | Yes                                                                                     | No                                                              | Partly                                                                                |
| Cai, 2020 [47]       | Yes                                                                                           | Yes                                                                               | Yes                                                                                            | Yes                                                                                     | Yes                                                             | Yes                                                                                   |
| Chen, 2020 [48]      | Yes                                                                                           | Yes                                                                               | Yes                                                                                            | Yes                                                                                     | Partly                                                          | Yes                                                                                   |

(Contd...)

**Supplementary Table 2 (Continued)**

| Study, year                        | Participation<br>(The study sample represents population of interest on key characteristics?) | Attrition<br>(The proportion of study sample providing outcome data is adequate?) | Prognostic factor measurement<br>(Prognostic factor is adequately measured in study subjects?) | Outcome measurement (The outcome of interest is adequately measured in study subjects?) | Study confounders<br>(Potential confounders are accounted for?) | Statistical analysis?<br>(Statistical analysis appropriately designed for the study?) |
|------------------------------------|-----------------------------------------------------------------------------------------------|-----------------------------------------------------------------------------------|------------------------------------------------------------------------------------------------|-----------------------------------------------------------------------------------------|-----------------------------------------------------------------|---------------------------------------------------------------------------------------|
| Chen, 2020 [49]                    | Yes                                                                                           | Yes                                                                               | No                                                                                             | Partly                                                                                  | No                                                              | Yes                                                                                   |
| Cholankeril, 2020 [50]             | Yes                                                                                           | Yes                                                                               | No                                                                                             | Yes                                                                                     | No                                                              | Partly                                                                                |
| Diaz, 2020 [51]                    | Yes                                                                                           | Yes                                                                               | No                                                                                             | Yes                                                                                     | No                                                              | No                                                                                    |
| Duan, 2020 [52]                    | Yes                                                                                           | Yes                                                                               | Yes                                                                                            | Yes                                                                                     | No                                                              | Yes                                                                                   |
| Fan, 2020 [53]                     | Yes                                                                                           | Yes                                                                               | Partly                                                                                         | Yes                                                                                     | No                                                              | Yes                                                                                   |
| Hajifathalian, 2020 [54]           | Yes                                                                                           | Yes                                                                               | No                                                                                             | Yes                                                                                     | No                                                              | Partly                                                                                |
| Han, 2020 [55]                     | Yes                                                                                           | Yes                                                                               | No                                                                                             | Yes                                                                                     | No                                                              | Yes                                                                                   |
| He, 2020 [56]                      | Yes                                                                                           | Yes                                                                               | Yes                                                                                            | Yes                                                                                     | No                                                              | Yes                                                                                   |
| Hong, 2020 [57]                    | Yes                                                                                           | Yes                                                                               | Yes                                                                                            | Yes                                                                                     | No                                                              | Yes                                                                                   |
| Kaafarani, 2020 [58]               | Yes                                                                                           | Yes                                                                               | No                                                                                             | Yes                                                                                     | No                                                              | No                                                                                    |
| Kim, 2020 [59]                     | Partly                                                                                        | Yes                                                                               | No                                                                                             | Yes                                                                                     | No                                                              | Partly                                                                                |
| Klopfenstein, 2020 [60]            | Yes                                                                                           | Yes                                                                               | No                                                                                             | Yes                                                                                     | No                                                              | No                                                                                    |
| Kluytmans-van den Bergh, 2020 [61] | Yes                                                                                           | Yes                                                                               | No                                                                                             | Yes                                                                                     | No                                                              | Yes                                                                                   |
| Lian, 2020 [62]                    | Yes                                                                                           | Yes                                                                               | No                                                                                             | Yes                                                                                     | No                                                              | Yes                                                                                   |
| Lin, 2020 [63]                     | Yes                                                                                           | Yes                                                                               | No                                                                                             | Yes                                                                                     | No                                                              | Yes                                                                                   |
| Liu, 2020 [64]                     | Yes                                                                                           | Yes                                                                               | No                                                                                             | Yes                                                                                     | No                                                              | Yes                                                                                   |
| Liu, 2020 [65]                     | Yes                                                                                           | Yes                                                                               | No                                                                                             | Yes                                                                                     | No                                                              | Yes                                                                                   |
| Meng, 2020 [66]                    | Partly                                                                                        | Yes                                                                               | No                                                                                             | Yes                                                                                     | Yes                                                             | Yes                                                                                   |
| Nobel, 2020 [67]                   | Yes                                                                                           | Yes                                                                               | No                                                                                             | Yes                                                                                     | No                                                              | Yes                                                                                   |
| Palaiodimos, 2020 [68]             | Yes                                                                                           | Yes                                                                               | No                                                                                             | Yes                                                                                     | Yes                                                             | Yes                                                                                   |
| Pan, 2020 [69]                     | Yes                                                                                           | Yes                                                                               | Yes                                                                                            | Yes                                                                                     | No                                                              | Yes                                                                                   |
| Phipps, 2020 [70]                  | Yes                                                                                           | Yes                                                                               | No                                                                                             | Yes                                                                                     | No                                                              | Partly                                                                                |
| Redd, 2020 [71]                    | Yes                                                                                           | Yes                                                                               | No                                                                                             | Yes                                                                                     | Yes                                                             | Yes                                                                                   |
| Remes-Troche, 2020 [72]            | Yes                                                                                           | Yes                                                                               | No                                                                                             | Yes                                                                                     | No                                                              | No                                                                                    |
| Shang, 2020 [73]                   | Yes                                                                                           | Yes                                                                               | No                                                                                             | Yes                                                                                     | No                                                              | Yes                                                                                   |
| Sun, 2020 [74]                     | Yes                                                                                           | Yes                                                                               | Yes                                                                                            | Yes                                                                                     | No                                                              | Yes                                                                                   |
| Wan, 2020 [75]                     | Yes                                                                                           | Yes                                                                               | No                                                                                             | Yes                                                                                     | Partly                                                          | No                                                                                    |
| Wang, 2020 [76]                    | Yes                                                                                           | Yes                                                                               | Yes                                                                                            | Yes                                                                                     | No                                                              | Yes                                                                                   |
| Wang, 2020 [77]                    | Partly                                                                                        | Yes                                                                               | Yes                                                                                            | Yes                                                                                     | No                                                              | Partly                                                                                |
| Wang, 2020 [78]                    | Yes                                                                                           | Yes                                                                               | Yes                                                                                            | Yes                                                                                     | No                                                              | Yes                                                                                   |
| Wang, 2020 [79]                    | Yes                                                                                           | Yes                                                                               | Yes                                                                                            | Yes                                                                                     | Yes                                                             | Yes                                                                                   |
| Wang, 2020 [80]                    | Yes                                                                                           | Yes                                                                               | Yes                                                                                            | Yes                                                                                     | No                                                              | Partly                                                                                |
| Wei, 2020 [81]                     | Yes                                                                                           | Yes                                                                               | No                                                                                             | Yes                                                                                     | No                                                              | Yes                                                                                   |
| Yan, 2020 [82]                     | Yes                                                                                           | No                                                                                | No                                                                                             | Yes                                                                                     | No                                                              | Yes                                                                                   |
| Yang, 2020 [83]                    | Yes                                                                                           | Yes                                                                               | Yes                                                                                            | Yes                                                                                     | No                                                              | Yes                                                                                   |
| Zhang, 2020 [84]                   | Yes                                                                                           | Yes                                                                               | Yes                                                                                            | Yes                                                                                     | No                                                              | Yes                                                                                   |
| Zhang, 2020 [85]                   | Yes                                                                                           | Yes                                                                               | Yes                                                                                            | Yes                                                                                     | No                                                              | Yes                                                                                   |
| Zhang, 2020 [86]                   | Yes                                                                                           | Yes                                                                               | Yes                                                                                            | Yes                                                                                     | No                                                              | Yes                                                                                   |
| Zhao, 2020 [87]                    | Yes                                                                                           | Yes                                                                               | Yes                                                                                            | Yes                                                                                     | No                                                              | Yes                                                                                   |
| Zheng, 2020 [88]                   | Yes                                                                                           | Yes                                                                               | Yes                                                                                            | Yes                                                                                     | No                                                              | Yes                                                                                   |
| Zhou, 2020 [89]                    | Yes                                                                                           | Yes                                                                               | No                                                                                             | Yes                                                                                     | No                                                              | Yes                                                                                   |

Yes: study accounted for the variable, No: Study did not account for the variable, Partly: Study accounted somewhat for the variable

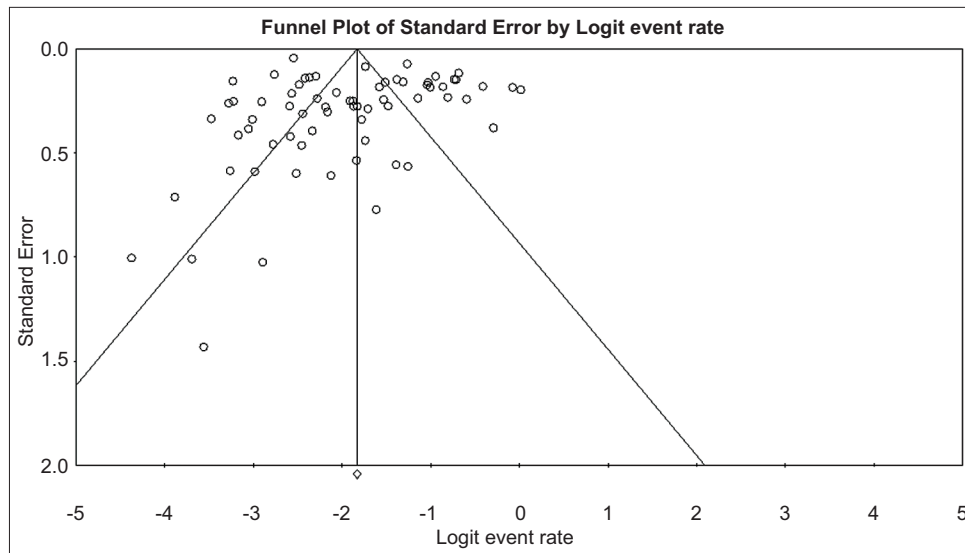

**Supplementary Figure 1** Funnel plot signifying visible asymmetry based on diarrhea for COVID-19 patients

**PRISMA CHECKLIST**

| Section/topic             | #  | Checklist item                                                                                                                                                                                                                                                                                              | Reported on page #       |
|---------------------------|----|-------------------------------------------------------------------------------------------------------------------------------------------------------------------------------------------------------------------------------------------------------------------------------------------------------------|--------------------------|
| <b>TITLE</b>              |    |                                                                                                                                                                                                                                                                                                             |                          |
| Title                     | 1  | Identify the report as a systematic review, meta-analysis, or both.                                                                                                                                                                                                                                         | 1                        |
| <b>ABSTRACT</b>           |    |                                                                                                                                                                                                                                                                                                             |                          |
| Structured summary        | 2  | Provide a structured summary including, as applicable: background; objectives; data sources; study eligibility criteria, participants, and interventions; study appraisal and synthesis methods; results; limitations; conclusions and implications of key findings; systematic review registration number. | 4                        |
| <b>INTRODUCTION</b>       |    |                                                                                                                                                                                                                                                                                                             |                          |
| Rationale                 | 3  | Describe the rationale for the review in the context of what is already known.                                                                                                                                                                                                                              | 5                        |
| Objectives                | 4  | Provide an explicit statement of questions being addressed with reference to participants, interventions, comparisons, outcomes, and study design (PICOS).                                                                                                                                                  | 5                        |
| <b>METHODS</b>            |    |                                                                                                                                                                                                                                                                                                             |                          |
| Protocol and registration | 5  | Indicate if a review protocol exists, if and where it can be accessed (e.g., Web address), and, if available, provide registration information including registration number.                                                                                                                               | NA                       |
| Eligibility criteria      | 6  | Specify study characteristics (e.g., PICOS, length of follow-up) and report characteristics (e.g., years considered, language, publication status) used as criteria for eligibility, giving rationale.                                                                                                      | 6                        |
| Information sources       | 7  | Describe all information sources (e.g., databases with dates of coverage, contact with study authors to identify additional studies) in the search and date last searched.                                                                                                                                  | 6                        |
| Search                    | 8  | Present full electronic search strategy for at least one database, including any limits used, such that it could be repeated.                                                                                                                                                                               | 6, Supplementary Table 1 |
| Study selection           | 9  | State the process for selecting studies (i.e., screening, eligibility, included in systematic review, and, if applicable, included in the meta-analysis).                                                                                                                                                   | 6                        |
| Data collection process   | 10 | Describe method of data extraction from reports (e.g., piloted forms, independently, in duplicate) and any processes for obtaining and confirming data from investigators.                                                                                                                                  | 6, 7                     |
| Data items                | 11 | List and define all variables for which data were sought (e.g., PICOS, funding sources) and any assumptions and simplifications made.                                                                                                                                                                       | 6                        |

(Contd...)

**PRISMA CHECKLIST** (*Continued*)

| Section/topic                      | #  | Checklist item                                                                                                                                                                                                         | Reported on page #        |
|------------------------------------|----|------------------------------------------------------------------------------------------------------------------------------------------------------------------------------------------------------------------------|---------------------------|
| <b>TITLE</b>                       |    |                                                                                                                                                                                                                        |                           |
| Risk of bias in individual studies | 12 | Describe methods used for assessing risk of bias of individual studies (including specification of whether this was done at the study or outcome level), and how this information is to be used in any data synthesis. | 7                         |
| Summary measures                   | 13 | State the principal summary measures (e.g., risk ratio, difference in means).                                                                                                                                          | 6, 7                      |
| Synthesis of results               | 14 | Describe the methods of handling data and combining results of studies, if done, including measures of consistency (e.g., <i>I</i> <sup>2</sup> ) for each meta-analysis.                                              | 6, 7                      |
| Risk of bias across studies        | 15 | Specify any assessment of risk of bias that may affect the cumulative evidence (e.g., publication bias, selective reporting within studies).                                                                           | 7                         |
| Additional analyses                | 16 | Describe methods of additional analyses (e.g., sensitivity or subgroup analyses, meta-regression), if done, indicating which were pre-specified.                                                                       | 6, 7                      |
| <b>RESULTS</b>                     |    |                                                                                                                                                                                                                        |                           |
| Study selection                    | 17 | Give numbers of studies screened, assessed for eligibility, and included in the review, with reasons for exclusions at each stage, ideally with a flow diagram.                                                        | 8                         |
| Study characteristics              | 18 | For each study, present characteristics for which data were extracted (e.g., study size, PICOS, follow-up period) and provide the citations.                                                                           | 8                         |
| Risk of bias within studies        | 19 | Present data on risk of bias of each study and, if available, any outcome level assessment (see item 12).                                                                                                              | 12, Supplementary Table 2 |
| Results of individual studies      | 20 | For all outcomes considered (benefits or harms), present, for each study: (a) simple summary data for each intervention group (b) effect estimates and confidence intervals, ideally with a forest plot.               | Table 2                   |
| Synthesis of results               | 21 | Present results of each meta-analysis done, including confidence intervals and measures of consistency.                                                                                                                | 8 - 12                    |
| Risk of bias across studies        | 22 | Present results of any assessment of risk of bias across studies (see Item 15).                                                                                                                                        | 12                        |
| Additional analysis                | 23 | Give results of additional analyses, if done (e.g., sensitivity or subgroup analyses, meta-regression [see Item 16]).                                                                                                  | 8 - 12                    |
| <b>DISCUSSION</b>                  |    |                                                                                                                                                                                                                        |                           |
| Summary of evidence                | 24 | Summarize the main findings including the strength of evidence for each main outcome; consider their relevance to key groups (e.g., healthcare providers, users, and policy makers).                                   | 13                        |
| Limitations                        | 25 | Discuss limitations at study and outcome level (e.g., risk of bias), and at review-level (e.g., incomplete retrieval of identified research, reporting bias).                                                          | 14                        |
| Conclusions                        | 26 | Provide a general interpretation of the results in the context of other evidence, and implications for future research.                                                                                                | 15                        |
| <b>FUNDING</b>                     |    |                                                                                                                                                                                                                        |                           |
| Funding                            | 27 | Describe sources of funding for the systematic review and other support (e.g., supply of data); role of funders for the systematic review.                                                                             | 1                         |

From: Moher D, Liberati A, Tetzlaff J, Altman DG, The PRISMA Group. Preferred Reporting Items for Systematic Reviews and Meta-Analyses: The PRISMA Statement. *PLoS Med* 2009;6:e1000097.
